# Supplementary material
Source: PubMed Central journal article supplement (PMC3246556)
Supplement: NIHMS336754-supplement-14.pdf [file NIHMS336754-supplement-14.pdf]

## Supplemental Tables

### Supplemental Table 1. Area measurements of cells expressing *myl7*, *vmhc* and *amhc*

when Wnt signaling is increased and decreased.

|                | n  | <i>myl7</i> | s.d. | n  | <i>vmhc</i> | s.d. | n  | <i>amhc</i> | s.d. |
|----------------|----|-------------|------|----|-------------|------|----|-------------|------|
| cont hs@sphere | 20 | 1.89        | 0.45 | 24 | 0.71        | 0.27 | 16 | 1.36        | 0.33 |
| +wnt@sphere    | 28 | *3.01       | 1.31 | 14 | *1.07       | 0.36 | 12 | *2.67       | 1.05 |
| cont hs@shield | 34 | 1.82        | 0.30 | 25 | 0.71        | 0.14 | 47 | 1.68        | 0.32 |
| +wnt@shield    | 35 | *1.09       | 0.54 | 26 | 0.72        | 0.17 | 45 | *0.71       | 0.60 |
| cont hs@tb     | 24 | 1.65        | 0.37 | 18 | 0.54        | 0.14 | 20 | 1.43        | 0.30 |
| +wnt@tb        | 19 | *0.00       | 0.00 | 24 | *0.00       | 0.00 | 28 | *0.03       | 0.17 |
| cont hs@8s     | 19 | 1.50        | 0.34 | 24 | 0.82        | 0.21 | 26 | 1.47        | 0.30 |
| +wnt@8s        | 18 | *0.07       | 0.09 | 24 | *0.04       | 0.05 | 25 | *0.09       | 0.14 |
| cont hs@16s    | 14 | 1.43        | 0.32 | 13 | 0.76        | 0.11 | 20 | 1.79        | 0.34 |
| +wnt@16s       | 18 | 1.63        | 0.30 | 14 | 0.83        | 0.15 | 18 | 1.71        | 0.27 |

|                |    |       |      |    |       |      |    |       |      |
|----------------|----|-------|------|----|-------|------|----|-------|------|
| cont hs@sphere | 22 | 1.59  | 0.29 | 15 | 0.73  | 0.09 | 34 | 1.21  | 0.25 |
| -wnt@sphere    | 19 | *0.89 | 0.42 | 13 | *0.26 | 0.28 | 44 | *0.70 | 0.52 |
| cont hs@shield | 30 | 1.94  | 0.34 | 25 | 0.97  | 0.21 | 24 | 1.95  | 0.40 |
| -wnt@shield    | 25 | 2.08  | 0.28 | 36 | 0.99  | 0.25 | 23 | *1.01 | 0.62 |
| cont hs@tb     | 42 | 1.21  | 0.26 | 28 | 0.57  | 0.10 | 20 | 1.35  | 0.22 |
| -wnt@tb        | 36 | 1.18  | 0.26 | 38 | 0.52  | 0.13 | 25 | 1.35  | 0.24 |
| cont hs@8s     | 15 | 1.67  | 0.26 | 21 | 0.76  | 0.10 | 27 | 1.41  | 0.27 |
| -wnt@8s        | 21 | 1.57  | 0.28 | 19 | 0.77  | 0.18 | 28 | 1.36  | 0.25 |
| cont hs@16s    | 12 | 1.20  | 0.38 | 22 | 0.75  | 0.20 | 13 | 1.22  | 0.37 |
| -wnt@16s       | 17 | 1.26  | 0.25 | 20 | 0.70  | 0.13 | 18 | 1.21  | 0.27 |

Measurements are in arbitrary units. Asterisks indicate  $p < 0.05$  relative to controls as determined using Student's t-test.

### Supplemental Table 2. Number of atrial and ventricular cells in hearts at 48 hpf

after Wnt signaling is decreased at the TB stage.

|               | n  | atrial | s.d. | ventricular | s.d. |
|---------------|----|--------|------|-------------|------|
| control hs@tb | 25 | 70.3   | 13.4 | 95.7        | 22.3 |
| -wnt@tb       | 32 | 71.3   | 14.6 | 88.9        | 18.7 |

**Supplemental Table 3. Number of atrial and ventricular cells in hearts at 48 hpf when Wnt signaling is modulated at 16s.**

|                           | <b>n</b> | <b>atrial</b> | <b>s.d.</b> | <b>ventricular</b> | <b>s.d.</b> |
|---------------------------|----------|---------------|-------------|--------------------|-------------|
| <b>control (1)</b>        | 16       | 88.6          | 11.7        | 120.4              | 18.8        |
| <b>+wnt@16s (1)</b>       | 17       | *104.9        | 16.4        | 122.8              | 26.9        |
| <b>*control (2)</b>       | 27       | 84.7          | 23.0        | 104.1              | 20.6        |
| <b>*+wnt@16s (2)</b>      | 27       | *98.3         | 17.3        | 111.0              | 17.1        |
| <b>control hs@16s(1)</b>  | 40       | 88.7          | 15.4        | 107.9              | 19.5        |
| <b>-wnt@16s (1)</b>       | 47       | 83.9          | 15.5        | 112.8              | 18.1        |
| <b>control hs@16s(2)</b>  | 28       | 88.4          | 14.8        | 107.0              | 18.4        |
| <b>-wnt@16s (2)</b>       | 36       | 83.6          | 18.9        | 106.0              | 19.5        |
| <b>*control hs@16s(3)</b> | 24       | 104.0         | 13.6        | 122.6              | 15.6        |
| <b>*-wnt@16s (3)</b>      | 26       | *93.9         | 18.4        | 117.3              | 20.9        |

Asterisks indicate  $p < 0.05$  relative to controls as determined using Student's t-test.

**Supplemental Table 4. Area measurements of cells expressing *nkx2.5* and *tbx5a* after Wnt is increased at 16s.**

|                       | <b>n</b> | <b><i>nkx2.5</i></b> | <b>s.d.</b> | <b>n</b> | <b><i>tbx5a</i></b> | <b>s.d.</b> |
|-----------------------|----------|----------------------|-------------|----------|---------------------|-------------|
| <b>control hs@16s</b> | 11       | 1.16                 | 0.28        | 12       | 2.01                | 0.59        |
| <b>+wnt@16s</b>       | 15       | 1.26                 | 0.26        | 16       | *2.60               | 0.51        |

Measurements are in arbitrary units. Asterisks indicate  $p < 0.05$  relative to controls as determined using Student's t-test.

**Supplemental Table 5. pHH3 positive cells in the atrial myocardium/endocardium at 24 hpf after Wnt has been increased at 16s.**

|                       | <b>n</b> | <b>*myo+endo</b> | <b>**Ave. pHH3 myo+endo/embryo</b> |
|-----------------------|----------|------------------|------------------------------------|
| <b>control hs@16s</b> | 34       | 14 (41%)         | 0.5                                |
| <b>+wnt@16s</b>       | 19       | 9 (47%)          | 0.58                               |

\*Indicates the total number and percentage of embryos with pHH3 positive myocardial and endocardial cells.

\*\*Indicates the average number of pHH3 positive cells per embryo.

**Supplemental Table 6. pHH3 positive cells in the atrial myocardium and endocardium at 26 hpf after Wnt has been increased at 16s.**

|                       | <b>n</b> | <b>*myo</b> | <b>**Ave. pHH3 myo/embryo</b> | <b>*endo</b> | <b>**Ave. pHH3 endo/embryo</b> |
|-----------------------|----------|-------------|-------------------------------|--------------|--------------------------------|
| <b>control hs@16s</b> | 47       | 13 (28%)    | 0.3                           | 22 (47%)     | 0.81                           |
| <b>+wnt@16s</b>       | 50       | 14 (28%)    | 0.3                           | 25 (50%)     | 0.72                           |

\*Indicates the total number and percentage of embryos with pHH3 positive myocardial or endocardial cells.

\*\*Indicates the average number of pHH3 positive myocardial or endocardial cells per embryo.
